# Sardine potential habitat and environmental forcing off western Portugal

Juan P. Zwolinski, Paulo B. Oliveira, Victor Quintino, and Yorgos Stratoudakis

Zwolinski, J. P., Oliveira, P. B., Quintino, V., and Stratoudakis, Y. 2010. Sardine potential habitat and environmental forcing off western Portugal. – ICES Journal of Marine Science, 67: 1553–1564.

Relationships between sardine (*Sardina pilchardus*) distribution and the environment off western Portugal were explored using data from seven acoustic surveys (spring and autumn of 2000, 2001, 2005, and spring 2006). Four environmental variables (salinity, temperature, chlorophyll *a*, and acoustic epipelagic backscatter other than fish) were related to the acoustic presence and density of sardine. Univariate quotient analysis revealed sardine preferences for waters with high chlorophyll *a* content, low temperature and salinity, and low acoustic epipelagic backscatter. Generalized additive models depicted significant relationships between the environment and sardine presence but not with sardine density. Maps of sardine potential habitat (SPH) built upon the presence/absence models revealed a clear seasonal effect in the across-bathymetry and alongshelf extension of SPH off western Portugal. During autumn, SPH covered a large part of the northern Portuguese continental shelf but was almost absent from the southern region, whereas in spring SPH extended farther south but was reduced to a narrow band of shallow coastal waters in the north. This seasonal pattern agrees with the spatio-temporal variation of primary production and oceanic circulation described for the western Iberian shelf.

**Keywords:** acoustic surveys, continental shelf, mesoscale circulation, pelagic habitat.

Received 2 April 2009; accepted 23 February 2010; advance access publication 25 June 2010.

J. P. Zwolinski, P. B. Oliveira, and Y. Stratoudakis: INRB/L-IPIMAR, Avenida de Brasília, 1449-006 Lisboa, Portugal. J. P. Zwolinski: current address: Southwest Fisheries Science Center, 8604 La Jolla Shores Drive, La Jolla, CA 92037, USA. V. Quintino: CESAM, Departamento de Biologia, Universidade de Aveiro, 3810-193 Aveiro, Portugal. Correspondence to J. P. Zwolinski: tel: +858 546 5654; fax: +858 546 7003; e-mail: juan.zwolinski@noaa.gov.

## Introduction

Small pelagic fish (SPF; sardine and anchovy) play a key ecological role in coastal ecosystems, transferring energy from plankton to upper trophic levels (Cury *et al.*, 2000). Their relatively low position in the marine foodweb, together with a short lifespan and a reproductive strategy of producing large quantities of pelagic eggs over an extended spawning season, render them greatly dependent on the environment (Bakun, 1996). At scales spanning from days to weeks and from tens of metres to tens of kilometres, the distribution of SPF largely responds to environmental stimuli (Mackinson *et al.*, 1999; Robinson, 2004; Barange *et al.*, 2005). However, at any given time, the environmental factors that drive their distribution can be confounded by biological constraints such as population size, demographic structure, or spatio-temporal lags between the environment and biological processes (Grémillet *et al.*, 2008). As a result, understanding the environmental conditions that drive the distribution of SPF by defining their potential habitat requires information over large spatial and temporal scales (Mackinson *et al.*, 1999; Planque *et al.*, 2007). Only when the species distribution and the concurrent environmental variables are observed and collected over a wide range of conditions (such as those obtained during a series of synoptic monitoring surveys) can the statistical relationships indicative of dependence or covariability be derived (Guisan and Zimmermann, 2000; Barry and Elith, 2006).

Sardine, also called European pilchard (*Sardina pilchardus*), can be found throughout the North Atlantic eastern continental margin from Senegal to the British Isles and in the Mediterranean and adjacent seas (Parrish *et al.*, 1989). They are commercially exploited across their distribution range, with the most important fisheries in upwelling areas. Sardine are eurythermic and euryhaline clupeoids that generally inhabit waters with temperatures ranging from 8°C to 24°C and salinities from 30 to 38 psu (Haynes and Nichols, 1994; Giannoulaki *et al.*, 2005; Coombs *et al.*, 2006; Petitgas *et al.*, 2006; Stratoudakis *et al.*, 2007). Similar to other clupeoids, they are opportunistic omnivorous feeders well adapted to the variable food sources available in upwelling systems (Bode *et al.*, 2004; Somarakis *et al.*, 2006; Garrido *et al.*, 2007). In Portugal (Figure 1), the sardine is the most important marine resource, being fished by purse-seiners in coastal waters (Stratoudakis and Marçalo, 2002). The majority of the Portuguese landings is caught by the purse-seine fleet operating north of Lisbon (ICES, 2006; Silva *et al.*, 2009), in an area known to have a relatively high abundance of both adults and recruits (Carrera and Porteiro, 2003). South of Lisbon, commercial catches and estimates from acoustic surveys show that sardine abundance is usually less than that in the north.

The Iberian Peninsula is situated at the northern limit of the North Atlantic Upwelling Region. Off western Iberia, winds favourable for upwelling occur more consistently between April and October (Fiúza *et al.*, 1982), but with short upwelling episodes

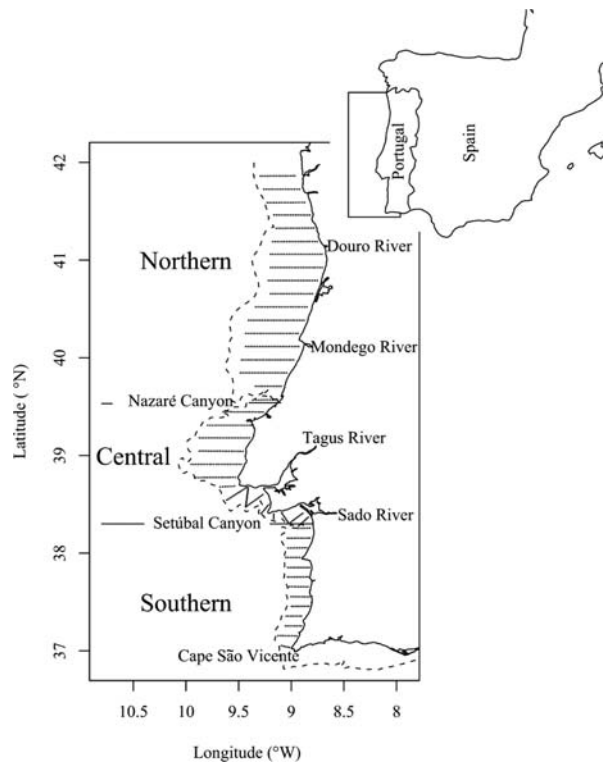

**Figure 1.** The survey region, with full and dashed lines representing the coast and the 200 m isobath contour, respectively. The dots along parallel lines mark 1 nautical mile long acoustic samples. The transect separation is 8 nautical miles.

all year round (Santos *et al.*, 2004). Along the western Portuguese continental shelf, water characteristics show a gradual north/south trend, with colder, less saline, and nutrient-richer waters in the north and warmer, more-saline, and nutrient-poorer waters in the south (Peliz and Fiúza, 1999). Along the northern coast, a low-salinity-buoyant plume (the Western Iberian Buoyant Plume; WIBP) is recurrent on the inner shelf owing to the high freshwater run-off. The WIBP has been identified as an important feature for retention and growth of early stages of SPF (Santos *et al.*, 2004). Also, because of enrichment from river run-offs, productivity in coastal waters of the northern Portuguese shelf is relatively high during winter, contrasting with the more oligotrophic conditions over the narrow continental shelf south of Lisbon (Peliz and Fiúza, 1999). The whole western Portuguese continental shelf is also rich in temporary oceanographic events that reshape and confound the mesoscale (tens to hundreds of kilometres) oceanographic patterns described above (Relvas *et al.*, 2007).

Under the hypothesis that sardine-mesoscale-spatial distribution is driven by environmental forcing, we aimed to describe the environmental conditions suitable for sardine presence off western Portugal. Sardine distribution obtained during seven acoustic surveys (spring and autumn of 2000, 2001, 2005, and spring 2006) was used to explore the relationships with a set of environmental variables measured *in situ*. These were salinity, temperature, and fluorescence from chlorophyll *a* measured 3 m deep, and acoustic backscatter at 38 kHz from diffuse-backscattering targets (DBTs) integrated over the water column. Generalized additive models (GAMs) were used to capture

synoptic multi-annual relationships between the species distribution and the relevant environmental variables. The SPH for each survey, i.e. the spatial extent where a suitable environment existed, was recreated by spatially interpolating and mapping the habitat conditions measured in the discrete sampling locations. Finally, the results were evaluated in the context of existing understanding of water circulation and productivity patterns off western Iberia.

## Material and methods

### Data collection

The study took place on the western Portuguese continental shelf (Figure 1), from the Portuguese/Spanish border (River Minho; 41°54.4'N 8°54.5'W) to Cape São Vicente (southwest Portugal at 37°1.45'N 8°59.71'W). Three distinct areas can be considered based on the geomorphology of the shelf and historical records of sardine distribution. The northern region, from the northern Portuguese border to the Nazaré Canyon, is characterized by a wide (50–60 km) soft-bottom continental shelf with intense freshwater run-off, mainly from the Rivers Minho, Douro, and Mondego. It is an area of abundant sardine and recurrent recruitment (Carrera and Porteiro, 2003; ICES, 2006; Silva *et al.*, 2009). The central region, from the Nazaré Canyon to the Setúbal Canyon, is characterized by a wide extension of shallow rocky bottom followed by a relatively narrow shelf influenced by river run-off from the Tagus and Sado estuaries. Adult sardine are ubiquitous there, whereas recruits are frequently found between the Sado and Tagus Rivers. Finally, the southern region, extending south of the Sado River to Cape São Vicente, is characterized by a narrow (~25 km), rocky bottom, and steep continental shelf with little influence from the river run-off. Compared with the other two regions, sardine presence is less frequent and only adult fish are encountered (ICES, 2006).

Acoustic data were obtained during seven acoustic surveys (March and November 2000, March and November 2001, April and November 2005, and April 2006). The acoustic sampling design (Figure 1) was the same for all surveys and consisted of a regular track with an inter-transect distance of 8 nautical miles covering the continental shelf between 20 and 170/200 m. Surveying was limited to daylight (Zwolinski *et al.*, 2007) and the vessel speed was ~10 knots. Acoustic sampling was performed with a Simrad EK500 echosounder, operating through a hull-mounted 38 kHz, 7° × 8° split-beam transducer emitting 1-ms-long pulses at a rate of 1 pulse s<sup>-1</sup>. The echosounder was calibrated before each survey by means of a copper sphere, according to the standard procedure (Foote *et al.*, 1987). The echograms were digitally stored and post-processed with MOVIES+ software (Weill *et al.*, 1993). Echogram scrutiny for sardine was visual and supported by pelagic and demersal trawls performed on representative echotraces. Epipelagic echotraces other than fish schools or school-like aggregations were classified as DBTs. These are characterized by their relatively low and homogeneous values of volume-backscattering strength ( $S_v$ ) and diffuse boundaries. Acoustic samples for sardine and DBTs were obtained by performing echo-integration from 20 cm above the seabed to 3 m below the transducer, along 1 nautical mile elementary distance sampling units. The minimum  $S_v$  integration threshold for fish and DBT was set at -60 dB, which is the value used for echo-integration of sardine for assessment purposes. For DBTs, the -60 dB value ensures that backscattering from physical sources such as

turbulence (e.g. pycnoclines, horizontal shear; Goodman, 1990; Lavery *et al.*, 2007) or typical sardine prey (phyto- and microzooplankton organisms; Bode *et al.*, 2004; Garrido *et al.*, 2008) are most likely not captured (Lavery *et al.*, 2007). With this threshold, DBT echoes are likely attributed to aggregations of highly reflective targets such as elastic-shelled or gas-bearing planktonic organisms (Stanton *et al.*, 1996; Mair *et al.*, 2005). However, as the surveys were aimed at assessing the abundance of SPF, there was no concurrent plankton sampling, precluding quantitative characterization of the planktonic community.

Along the transects, seawater from 3-m deep was pumped on board by means of a side-mounted submersible pump. Salinity (psu) and temperature (°C) from the pumped water were monitored at a rate of 1 measurement per second by a Seabird SBE thermosalinograph (initial accuracy of 0.002°C for temperature and 0.005 psu for salinity). Fluorescence (a proxy for chlorophyll *a* concentration) from the pumped water was measured at a rate of 1 measurement per second using a Wetlabs WS3S-963P fluorometer (sensitivity > 0.03 µg l<sup>-1</sup>). Data from the thermosalinograph and the fluorometer were gathered by Environmental Data Acquisition System (EDAS) software version 1.5, set to provide geo-referenced 18-min sample averages (corresponding to 3 nautical mile integration intervals at a speed of 10 knots). The 18-min samples were posteriorly associated with the nearest acoustic sample. Together, the acoustic nautical area scattering coefficient (NASC; MacLennan *et al.*, 2002) originating from DBTs and the surface oceanographic variables constituted the set of environmental variables used to characterize sardine habitat.

### Statistical analysis

Sardine environmental preferences were analysed using the data from all but the spring 2006 survey. The 2006 data were used to test the predictive ability of the fitted habitat model.

Exploratory bidimensional analysis of the presence/absence data was performed by quotient analysis (Lluch-Belda *et al.*, 1991) using the routines available in the library *shachar* (Bernal *et al.*, 2007) for R (R Development Core Team, 2005). For the *i*th-discrete class of a continuous explanatory variable, the quotient  $Q_i$  is calculated from

$$Q_i = \frac{y_i/y}{n_i/n}, \quad (1)$$

where  $y_i$  is the number of observations with presence (coded as 1),  $y$  the sum of the  $y_i$  across all classes,  $n_i$  the number of observations in the class, and  $n$  the total number of observations in all classes. A plot of  $Q_i$  against the explanatory variable provides an indication of sardine environmental preferences.

Apart from the NASC of DBTs for which we have no source of comparison available, the environmental variables encountered during the surveys had values that were well within the range of adult sardine physiological-tolerance limits (Haynes and Nichols, 1994; Stratoudakis *et al.*, 2007). This fact suggests that the effect of the environmental variables on the pattern of space occupation by sardine, if any, might not be related to sardine physiological stress. Instead, the studied variables might be surrogates for food availability, better spawning conditions, energy savings, or other unknown benefits associated with particular water masses. In these cases, it might not be the absolute values of the environmental variables that drive the species distribution, but their relative values. When data from several years are combined in a single analysis, the signals from the annual gradients might

fade or be lost through interannual variability. Therefore, for each survey, the environmental variables were standardized by subtracting their respective survey mean and dividing by the survey standard deviation. Fluorescence and DBT (NASC + 1) were log-transformed before standardization to reduce the positive skewness of the raw data. The presence of structure in the environmental variables was tested by principal component analysis (PCA; Venables and Ripley, 2002).

The relationships between acoustic density and presence of sardine against the environmental variables were tested by GAMs. GAMs were chosen by their ability to fit a wide range of models (Wood, 2006). GAMs with a binomial error distribution and a logit-link function were fitted to sardine acoustic presence (binary response), and models with a negative binomial distribution and a log-link function were fitted to sardine NASC (continuous response). For both sardine presence and sardine NASC models, the tested explanatory variables were the set of standardized salinity, temperature, fluorescence, and DBT NASC, fitted either as single or multidimensional (up to three dimensions) smoothers using the default thin-plate spline basis available in the package *mgcv* (Wood, 2006) for R. A set of alternative models with varying degrees of complexity was built for both sardine NASC and sardine presence. To avoid overfitting, the gamma parameter in the GAM formulation was iteratively adjusted (up to 2.3 in the binary model) so that, in the final models, the estimated number of degrees of freedom remained <10% of the number of samples when working with density data or 10% of the number of the least represented class for the presence/absence data (Harrell *et al.*, 1996). The estimation of the smoothing parameter was done by generalized cross-validation, and the scale parameter was assumed unknown. Model selection, i.e. the exclusion or reduction of smoothing terms, was done via a mixed (backward and forward) stepwise process following the guidelines given in Wood and Augustin (2002) and Wood (2006). These include the closeness of the selected numbers of degrees of freedom of the smoother to 1, the envelope of the approximate confidence interval for the smoothers containing 0 throughout their range, and the values of the statistic representing the compromise between quality of fit and complexity of the models, such as generalized cross-validation score (GCV) or Akaike Information Criterion (AIC). For binary models, given the impossibility of using the percentage of deviance explained (McCullagh and Nelder, 1997), the global fit was assessed by the area under the receiver operating characteristics (ROC; Hanley and McNeil, 1982). This statistic represents the probability that for a random pair of presence (1) and absence (0) values, the fitted probability of the presence is higher than the fitted probability of the absence (Fawcett, 2006). The area under the ROC curve (AUC) is a particularly appealing statistic when comparing the models' performance over different scenarios of sardine abundance. As we defined the habitat suitability as a continuous measure between 0 and 1 (the output of a binomial model), the absolute values at which sardine are to be found is likely to change with abundance. Under large population levels, sardine are expected in less than optimal conditions. Conversely, when abundance is low, the sardine are most likely to occupy the most suitable habitat (McCall, 1990). Therefore, there is probably not a single value for the habitat index that can serve as a threshold for suitable habitat for all population levels. Using the AUC value, we can simply evaluate, both for each survey and for the whole dataset, if sardine presences are being attributed to,

on average, higher fitted values than sardine absences. Finally, to verify the lack of important variables in the model (Barry and Elith, 2006) and to examine the scale of the processes under study (Mackinson *et al.*, 1999), the spatial structure of the models' residuals and that of the original data were evaluated by variography (Chilès and Delfiner, 1999).

For each survey, a map of sardine potential habitat (SPH), expressed as the probability of sardine presence, was built by evaluating the multi-annual synoptic relationships obtained by GAMs at the environmental variables observed in each acoustic sample.

## Results

Sardine were found preferentially in waters < 100 m deep, typically in coastal shallow areas (Figure 2). The indicator semivariograms for sardine presence/absence revealed a relatively low level of small-scale spatial correlation (average nugget effect around 30% of the sill) and an average (isotropic) correlation distance of 16 nautical miles.

Overall, sardine NASC had a large number of zeroes (75% of the total samples) and a skewed distribution of the positive values (Figure 3a). The pooled (across surveys) mean and

maximum NASC of positive samples were 2272 and 36 800 m<sup>2</sup> per square nautical mile, respectively.

In all surveys, the northern region made the greatest contribution to the sardine accumulated acoustic backscatter over the survey area, varying between 55% of the total in spring 2000 and 98% in autumn 2005. The lowest contribution to the total sardine backscatter by survey was always in the south, where it never exceeded 10%. The central region always exhibited intermediate values. This pattern was also reflected in the proportion of non-zero samples in each region, with an increasing spatial occupation towards the north. Overall, the northern region always exhibited the highest percentage of occupied area, followed by the central and southern regions. Seasonal differences in sardine distribution were evident, with a southward shift during spring (Figure 3b) that promoted statistically significant variations in the proportion of occupied area across season in each region. In the northern region, the proportion of samples with sardine presence reduced from 0.42 in autumn to 0.35 in spring ( $p < 0.01$ ), mainly by contraction into shallower waters. In the central region, the seasonal effect was reversed and less intense, with an increase in sardine prevalence from 0.2 in autumn to 0.26 during spring ( $p < 0.05$ ). The southern region followed the

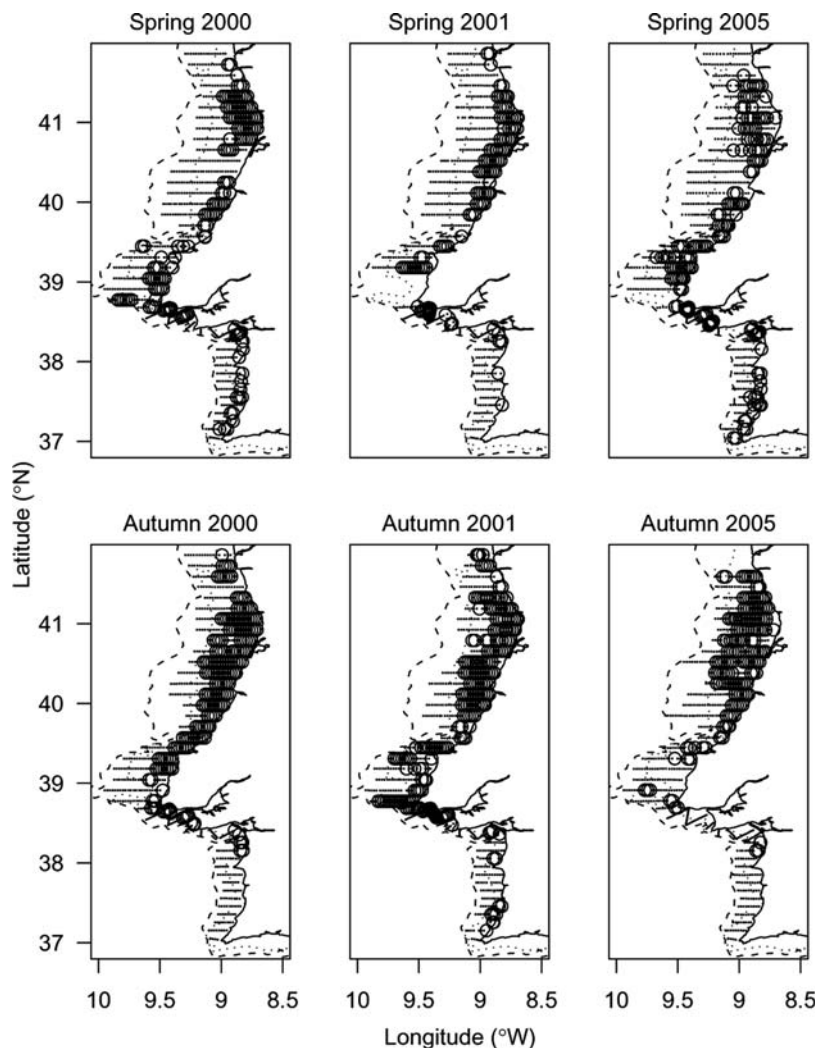

**Figure 2.** Distribution of acoustic samples with sardine presence (circles) superimposed on the distribution of total acoustic samples (dots) for each of the surveys used to model SPH.

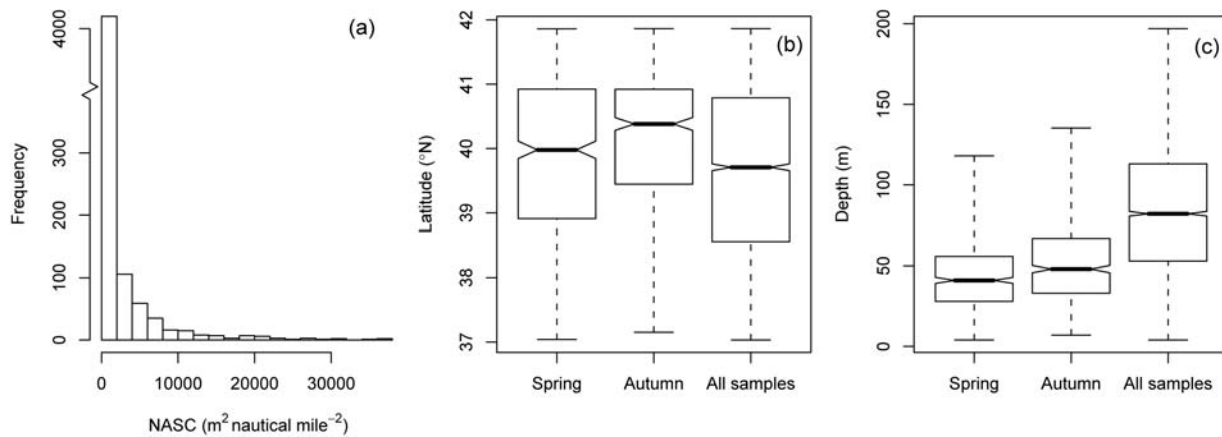

**Figure 3.** (a) Pooled distribution of NASC attributed to sardine on a linear scale. (b) Latitudinal and (c) bottom depth distribution of acoustic samples with sardine presence by season, together with the latitudinal and bottom depth distributions of all acoustic samples (including sardine absence). The whiskers extend the entire range of the data distribution. (Note that when the notches of two boxplots do not overlap there is strong evidence that the two medians differ; Chambers *et al.*, 1983.)

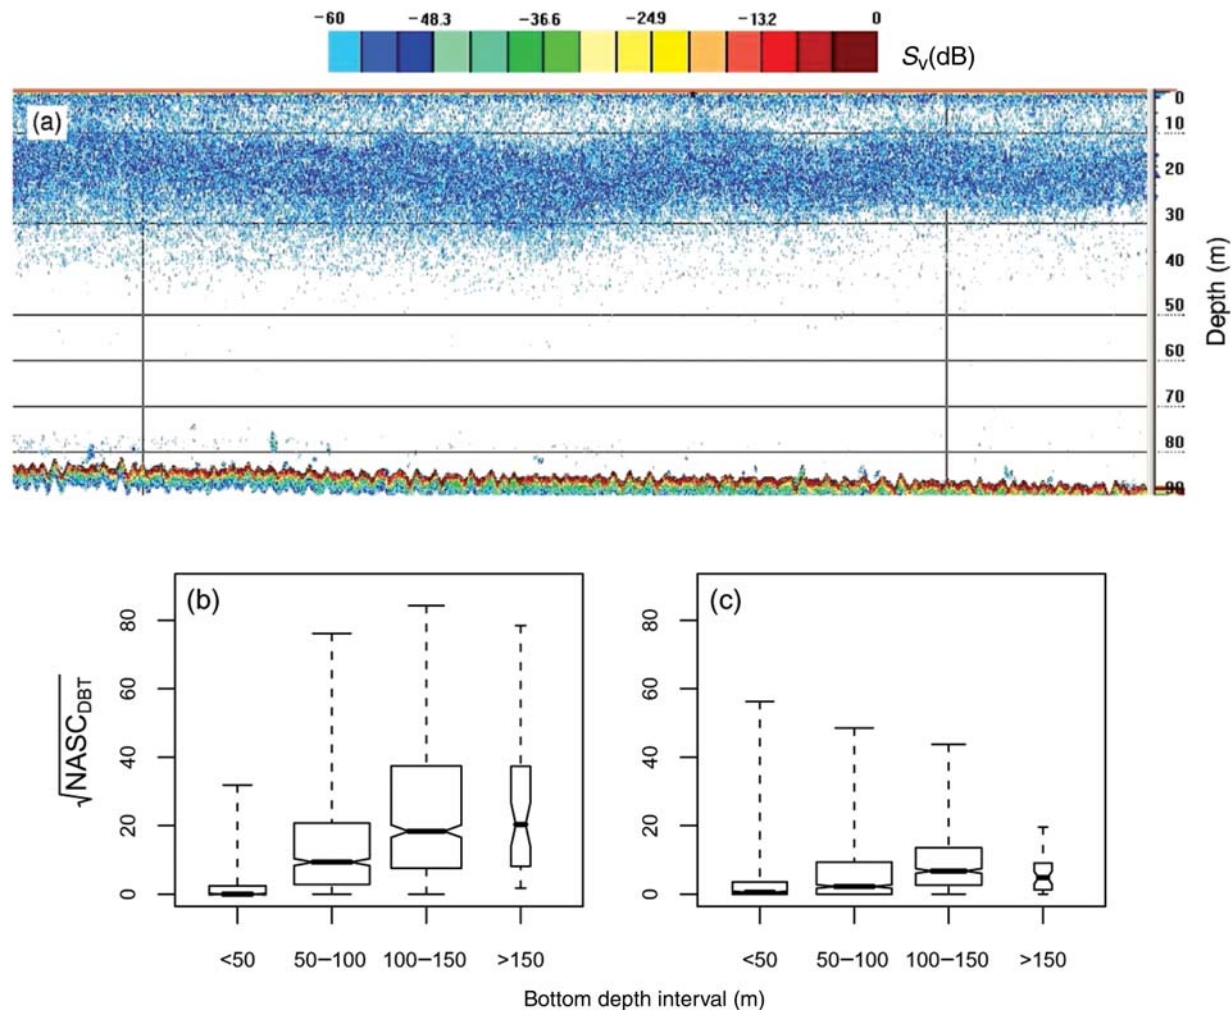

**Figure 4.** (a) Echogram at 38 kHz of DBTs, the vertical lines separated by 1 nautical mile. (b) Spring and (c) autumn square root of the NASC of DBTs by acoustic sample in relation to bottom depth. The whiskers extend the entire range of the data distribution. The width of the boxes is proportional to the square root of the number of observations. Note that when the notches of two boxplots do not overlap there is strong evidence that the two medians differ (Chambers *et al.*, 1983).

same trend as the central region, with an autumn prevalence of 0.05 that rose to 0.11 in spring ( $p < 0.01$ ). Finally, during spring, sardine were usually found shallower than in autumn (Figure 3c).

Seasonal and geographical differences were also found in the environmental variables. Large NASC values attributable to DBTs, found as uniform layers of large horizontal extension (Figure 4a), were more frequent and had greater acoustic intensity during spring, reaching values of up to 7000 m<sup>2</sup> per square nautical mile (Figure 4b, c). DBTs were usually distributed over large areas in the mid to outer shelf (bottom depth 100–150 m) and absent from coastal waters.

Surface salinity and temperature were mainly between 34 and 36.2 psu (mean 35.6) and 14°C and 17°C (mean 15.4°C), respectively. Both variables increased towards the south and offshore and were on average 0.5 psu and 0.35°C higher during autumn. Fluorescence (proportional to chlorophyll *a* concentration) had high intra- and intersurvey variability, presenting the highest coefficient of variation of the three variables: 72% vs. 6% and 3% of temperature and salinity, respectively. The average value was 0.23 mV, and the first and third quartiles were 0.14 and 0.25 mV, respectively, indicating a right-skewed distribution. There were no signs of seasonality, but fluorescence showed an upward trend towards the north and towards the coast, i.e. inverse to that of temperature and salinity.

Quotient analysis suggests that sardine off western Portugal were not randomly distributed with respect to the environmental variables. Sardine were more abundant in colder, less saline, more

productive waters with few or no DBTs (Figure 5). Quotients calculated for each season independently followed the same general pattern, suggesting that sardine responded to the environment in a similar way in both autumn and spring (not shown).

PCA showed the structure in the four oceanographic variables, with 85% of the variability being captured within the first three principal components (PCs; not shown). The first component, capturing 46% of the data variability, was positively correlated equally to salinity and temperature, and negatively correlated to fluorescence. The second PC, which captured 21% of the data variability, was highly correlated to DBT NASC and poorly correlated to the oceanographic variables, suggesting some degree of independence between DBTs and the remaining variables.

For both sardine presence and acoustic density, the full GAMs had four main effects (corresponding to the four environmental variables): one three-dimensional interaction with salinity, temperature, and fluorescence, suggested by the first PC, and two two-dimensional interactions of fluorescence and DBTs and fluorescence and temperature, suggested by the second and the third PC, respectively. This full model was fitted to all surveys except autumn 2000 (no salinity data) and spring 2006, which was kept for model validation. For acoustic density, using either all data or just the positive samples, GAMs did not reveal any significant relationships, suggesting that the environment, as represented here, was not the driver of the species density distribution.

For sardine presence/absence, the best model was much simpler than the full model (Table 1). The additive terms of the best model closely resembled the structure of the first and

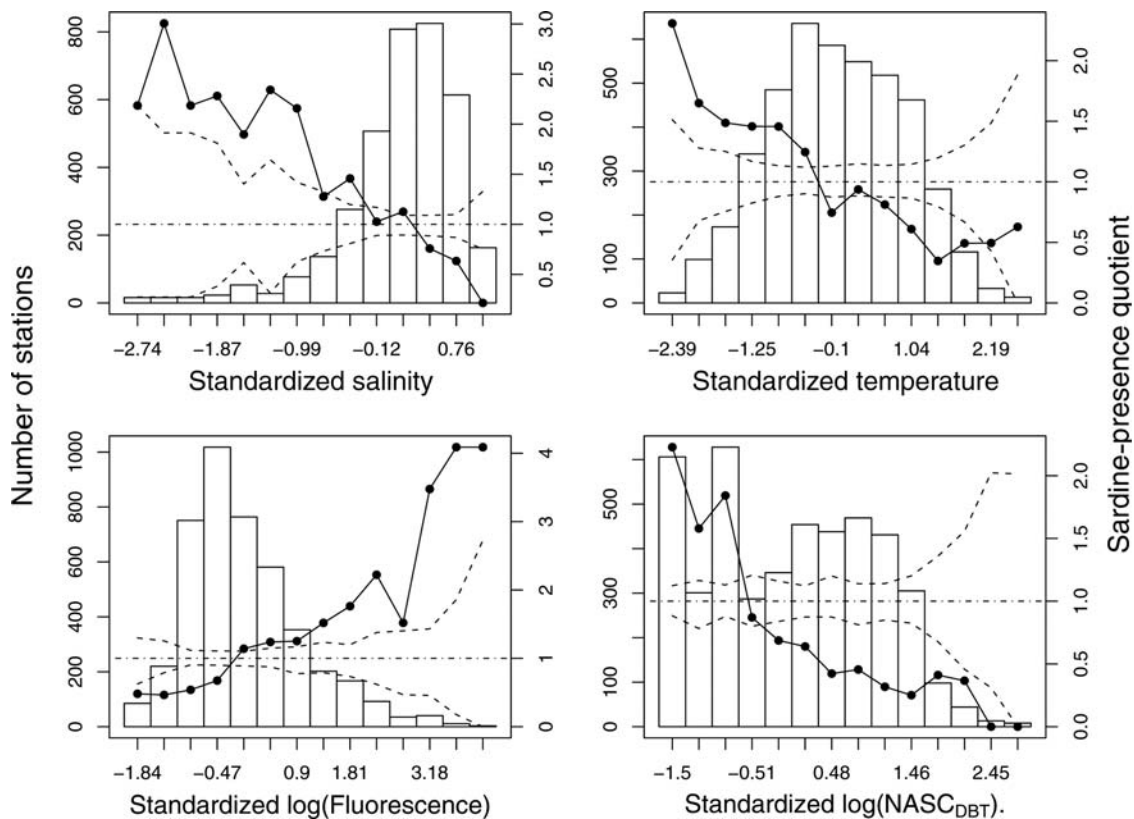

**Figure 5.** Quotient plots (continuous lines) of sardine presence against standardized environmental variables. Dashed lines limit the confidence envelope for quotients assuming that the observations were independent. The histograms represent the standardized values of the explanatory variables for all surveys combined.

**Table 1.** Summary of the sardine distribution models.

| Model                                     | d.f.        | GCV          |             |                       |                  |
|-------------------------------------------|-------------|--------------|-------------|-----------------------|------------------|
|                                           |             | score        | AIC         | AUC <sub>1</sub> (CV) | AUC <sub>2</sub> |
| $t + s + f + d + (f,d) + (t,f) + (s,t,f)$ | 51.7        | 0.831        | 2513        | 0.85 (5.9)            | 0.77             |
| <b><math>d + (s,t,f)</math></b>           | <b>35.7</b> | <b>0.806</b> | <b>2436</b> | <b>0.85 (6.1)</b>     | <b>0.81</b>      |
| $d + (t + f)$                             | 36.4        | 0.806        | 2440        | 0.85 (6.0)            | 0.80             |

" $t$ ", " $s$ ", " $f$ " and " $d$ " stand for standardized temperature, salinity, log(fluorescence), and log(NASC) of DBTs, respectively. All terms, either single or multivariate, are smooth terms using the default penalized thin-plate regression splines available in the mgcv package. AUC<sub>1</sub> is the average of the AUCs calculated for each survey use in model building. CV (%) refers to the coefficient of variation of the AUC. AUC<sub>2</sub> is the AUC value calculated for the spring 2006 survey, which was not used to build the model. The best model is emboldened and below it is a suboptimal model built without salinity to map the potential habitat of sardine for the autumn 2000 survey for which no salinity readings were available. The total number of observations was 3718 (3147 in the best model).

second PC, i.e. an interaction term for salinity, temperature, and fluorescence, and a single term for DBT NASC. Despite the low complexity, the model appeared to capture well the relationships between the environment and sardine distribution. The mean AUC value calculated for the surveys used in model building was 0.85, suggesting that the model was successful in capturing the global trends. Additionally, the minimum and maximum AUC of 0.81 and 0.94 calculated for spring 2000 and 2001 data, respectively, attest that the relationships observed were temporally consistent and that the model was able to predict sardine distribution reliably across the surveys. The latter is further emphasized

by the relatively good predictions obtained for spring 2006 data, for which an AUC value of 0.81 was obtained. Spatial correlation was observed in the residuals of the best presence/absence model, but the ranges of semivariograms were fairly reduced (almost reaching the resolution of our oceanographic data), and the nugget effect increased relative to the semivariograms of sardine presence (Figure 6). These results confirm that the model was able to capture the environmental pattern that drives the distribution of sardine at mesoscales.

Analysis of the model output (Figure 7) shows that sardine response to the environment is more complex than that allowed by the interpretation of single-variable preferences evaluated by quotient analysis (Figure 5). The water masses more likely for sardine presence were those with low backscatter of DBTs and high chlorophyll  $a$  concentrations in association with either high or low temperatures and low salinities (characteristic of freshwater enrichment), or with low temperatures and average salinities (indicative of coastal upwelled waters). On the opposite side, the waters less likely to contain sardine were oligotrophic oceanic waters characterized by high salinities, high temperatures, and low chlorophyll  $a$  concentrations, and in general waters with average to high backscatter of DBTs.

Maps of SPH were constructed for individual surveys by spatially interpolating the fitted values of the habitat model (Figure 8). The pattern of space occupation by sardine described above (Figure 2) was well captured by the environmental GAMs and appears consistent across years. In the north during spring, the fitted probability of sardine presence rapidly dropped from its coastal maximum to almost zero beyond the 75-m isobath.

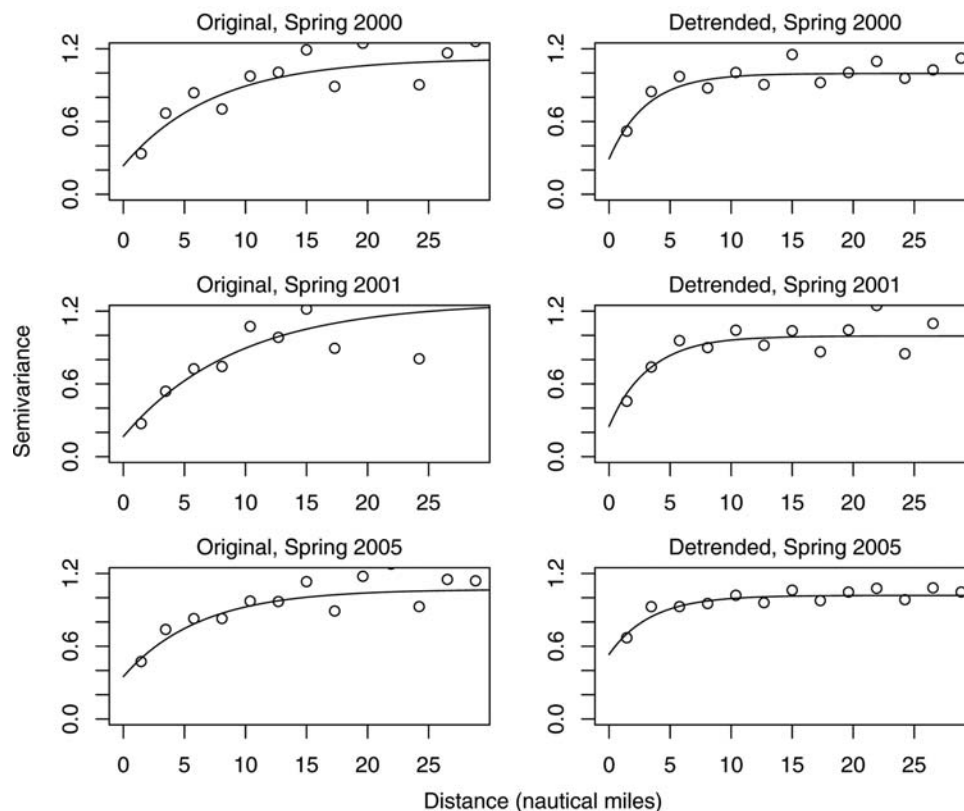**Figure 6.** Standardized semivariograms of sardine-presence data in the spring surveys paired with the GAM deviance residuals from the best model.

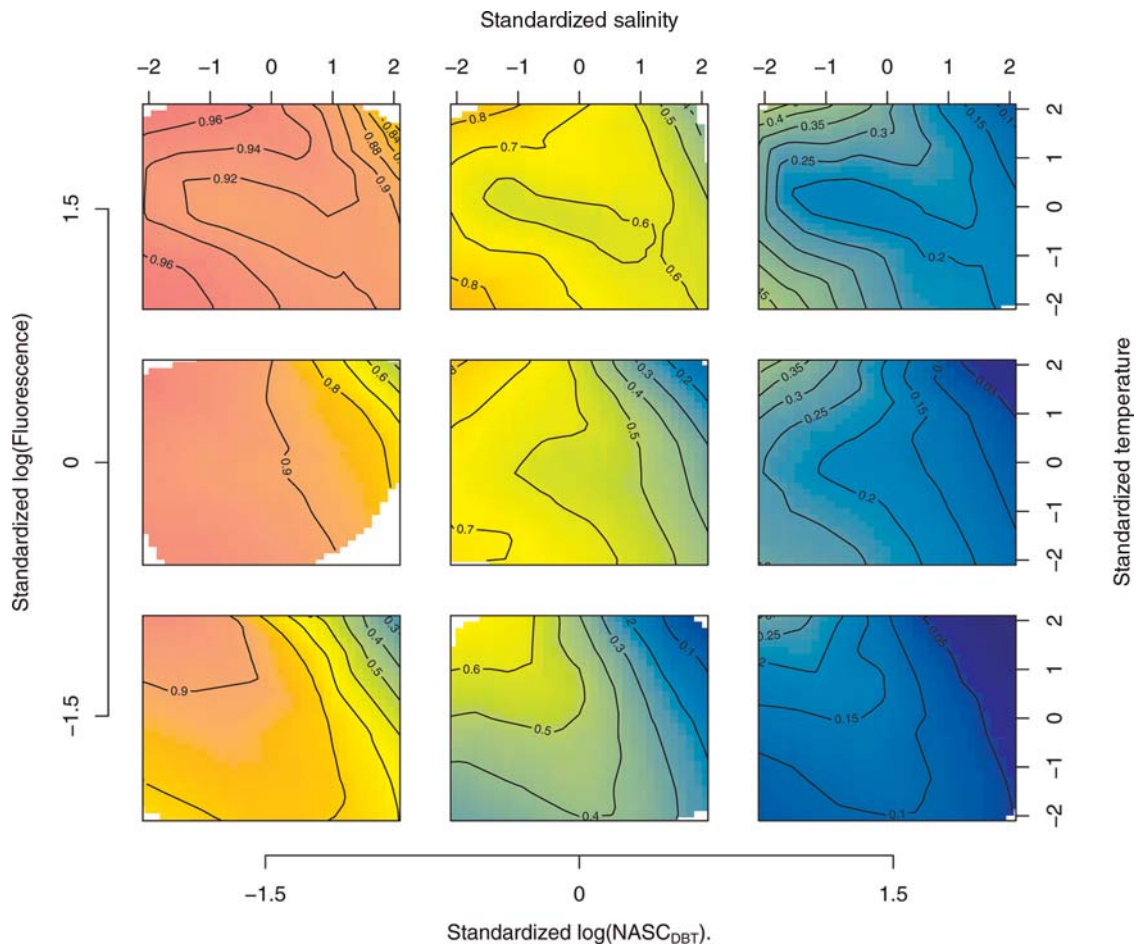

**Figure 7.** Probability surfaces of sardine presence for pairwise combinations of standardized temperature and salinity (contour plots) conditioned on three levels ( $-1.5$ ,  $0$  and  $1.5$ ) of the standardized  $\log(\text{NASC})$  of DBTs (external x-axis) and  $\log(\text{Fluorescence})$  (external y-axis).

This contrasted with the smoother autumn profile that rendered an overall higher probability of sardine presence across the whole northern region. In the central region, the average fitted probability of sardine encounter in spring was higher than in autumn, mostly because of the greater probabilities obtained in waters shallower than 100 m. In the southern region, the model showed a higher fitted probability during spring.

## Discussion

In this study, a series of acoustic surveys dedicated to estimating sardine abundance off western Portugal were used to obtain detailed information on the hydrological and biological conditions, to improve the understanding of the processes that regulate sardine mesoscale distribution off western Iberia. Although three of the four environmental variables were measured near the surface, so being prone to short-term variability and disassociation with the water-column properties, consistent relationships between the environmental variables and sardine presence were found, providing evidence that sardine distribution off Portugal is driven by the search for a particular set of environmental conditions.

The range of values of near-surface temperature and salinity observed during the series of surveys were in the mid-range of physiological tolerance limits of sardine, inferred from their

wide-scale distribution: sardine can be found across the northeastern Atlantic margin and Mediterranean Sea within the salinity range 30–38 psu (Petitgas *et al.*, 2006; Giannoulaki *et al.*, 2005) and with temperatures ranging between 8°C and 24°C (Haynes and Nichols, 1994; Giannoulaki *et al.*, 2005; Coombs *et al.*, 2006; Stratoudakis *et al.*, 2007). In the area of the study, sardine were more abundant in the lower range of the salinity distribution and rarely beyond 35.8 psu. A similar situation was observed for temperature, with sardine being predominantly found at lower temperatures, typically in waters  $<16^{\circ}\text{C}$ . This situation contrasts with the results of Giannoulaki *et al.* (2005) in the eastern Mediterranean, where higher temperatures were more likely to contain sardine. In the Bay of Biscay, Petitgas *et al.* (2006) found no preferences in relation to hydrographic conditions, although the contrasts for temperature and salinity were higher than those recorded here. It is therefore unlikely that the temperature and salinity preferences observed are the result of direct physiological benefits or constraint, and are more likely indicative of correlation to other variables that affect adult sardine directly, such as food availability.

Quotient analysis of log-transformed fluorescence suggested that the probability of finding sardine increased with increasing values of chlorophyll *a* in all surveys. The same pattern has been reported for other SPF, resulting most of the time in a coherent



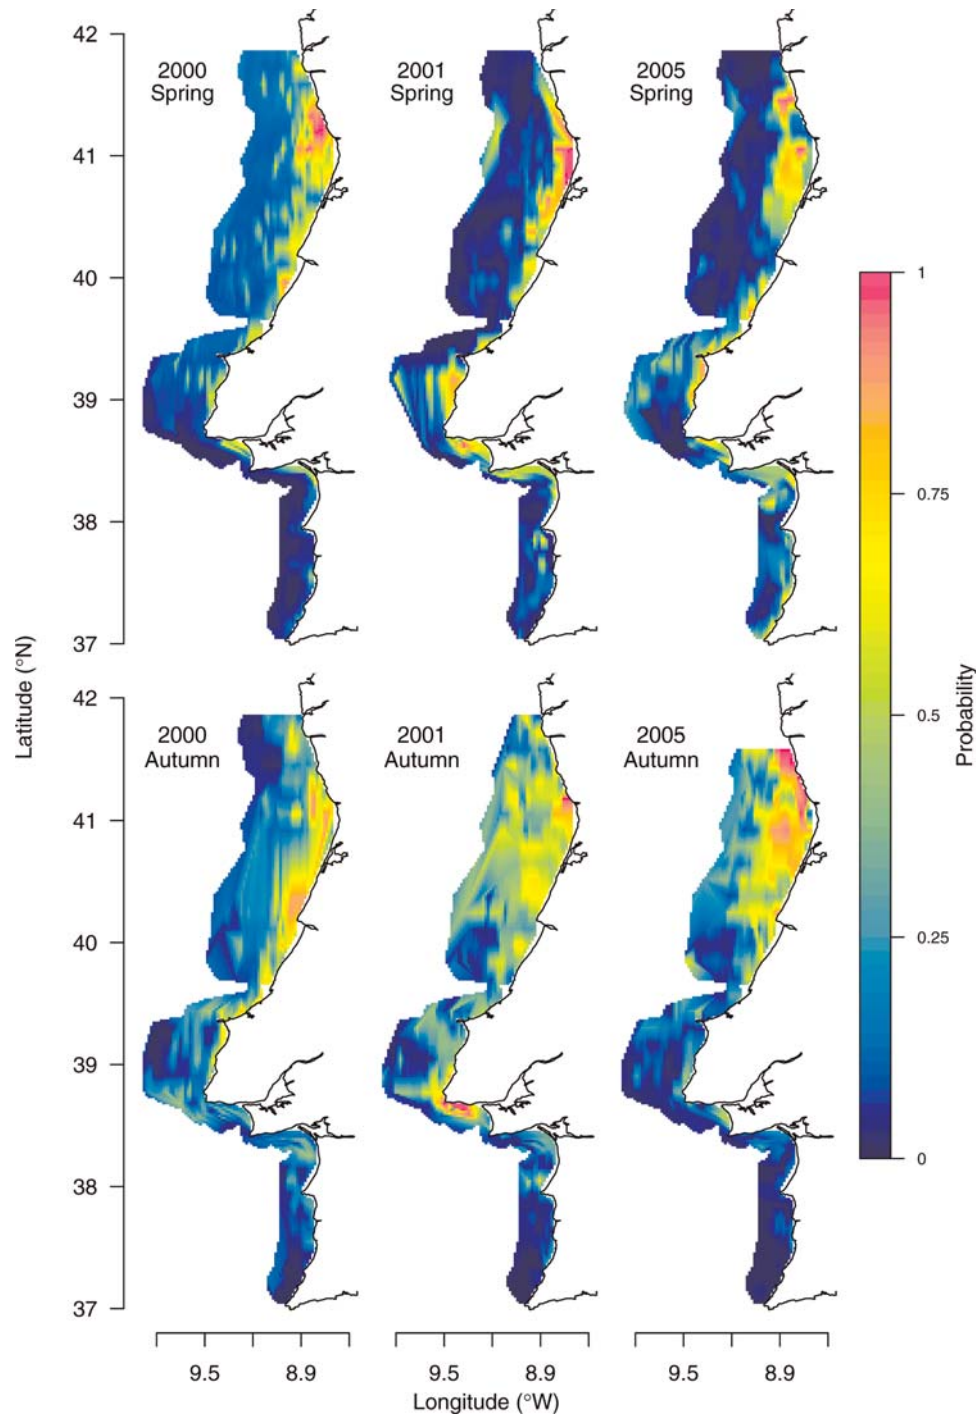

**Figure 8.** Potential habitat of sardine for spring and autumn of 2000, 2001, and 2005.

spatial distribution between fish and primary production areas (Tameishi *et al.*, 1996; Robinson, 2004; Twatwa *et al.*, 2005). This is not unexpected, because phytoplankton dominates sardine diet off western Iberia and provides a significant portion of the total carbon intake (Bode *et al.*, 2004; Garrido *et al.*, 2008). Moreover, sardine preference for high chlorophyll *a* water in both autumn and spring is an indication of the importance of food consumption throughout the protracted spawning season (Zwolinski *et al.*, 2001), an essential process in the maintenance of the reproductive effort that would otherwise be compromised

in the absence of adequate food supply (Ganias *et al.*, 2003; Twatwa *et al.*, 2005; Somarakis *et al.*, 2006).

The nature of DBTs is unknown, but given the strength of the echoes at 38 kHz, it is unlikely that the main scatterers are fluid-type zooplankton. Acoustic density calculations for copepods averaging 390  $\mu\text{m}$  (used here as an approximation of sardine prey) show that the lower detection threshold of  $-60$  dB could only be achieved by a density of  $4 \times 10^5$  ind.  $\text{dm}^{-3}$  (target strength obtained from Mair *et al.*, 2005), a density several orders of magnitude higher than the values reported from plankton samples off

Portugal (Villa *et al.*, 1997; Queiroga *et al.*, 2005). There was often clear separation between the spatial locations dominated by sardine and those dominated by DBTs. Although it is possible that the habitat of the DBTs is different from that of sardine, this view was not supported by the oceanographic variables we tested because no correlation was found between them and the DBTs. It is then possible that sardine avoided DBTs. Plankton samples from DBT regions collected in later surveys showed signs of a brown-coloured gel-like biofilm clogging the 200  $\mu\text{m}$  mesh of a bongo net that is suspected to be constituted by transparent exopolymer particles (TEPs; Passow, 2002). The presence of TEPs and, in particular, the presence of gas bubbles generated by microbial activity entrapped in the viscous TEP matrix could explain the large homogeneous backscattering layers observed in the echograms. Avoidance of TEP-rich areas by sardine, a filter-feeder well adapted to capture small zoo- and phytoplankton (Garrido *et al.*, 2007), could be explained by the presence of sticky filaments that might interfere in the process of feeding, as has been shown with zooplankton (Mari and Rassoulzadegan, 2004) and that are suspected to be the cause of mass mortalities in fish (Jenkinson, 1989).

The patterns described by the habitat model based exclusively on environmental variables without fixed spatial references (as opposed to bottom depth, distance from the shelf edge, etc.) were able to resolve a major part of the original mesoscale spatial structure of sardine distribution. Furthermore, the model predicted rather well the presence of sardine in the 2006 spring survey which was not used in model building. The fact that spatial correlation was still visible on the model's residuals and the inability to resolve acoustic density reveal two weaknesses of the data: the low resolution of the oceanographic variables in relation to the scales of space occupation by fish schools, and the potential lack of other relevant variables such as the density of zooplankton. However, it should be noted that schooling behaviour also plays an important role at smaller levels of organization (Fréon and Misund, 1999; Mackinson *et al.*, 1999; Zwolinski *et al.*, 2006), adding noise and unpredictability to the field of acoustic density (Petitgas, 1993; Zwolinski *et al.*, 2009).

The fitted values of the probability of sardine presence described adequately the seasonal pattern of sardine distribution, showing that the autumn concentration of sardine in the north and the spring contraction and concomitant southward extension were promoted by changes in SPH. We propose that this pattern of cyclic compression and expansion of a suitable habitat might be driven by a complex interaction of the seasonal cycles of river run-off, mesoscale oceanic circulation, direction and intensity of the wind, and thermal stratification (Peliz and Fiúza, 1999; Álvarez-Salgado *et al.*, 2003; Peliz *et al.*, 2005). Our findings of a reduced SPH off the southwestern coast and extensive potential habitat off northern Iberia in autumn are consistent with the annual climatological chlorophyll minimum to the south of Lisbon, a phenomenon simultaneous with the progressive increase in extension of the chlorophyll-rich waters over the northern shelf (Peliz and Fiúza, 1999). The low productivity in the south in autumn has been linked to the settlement of an oligotrophic, warm, more-saline water mass of oceanic origin over the slope and shelf, where the absence of upwelling-favourable winds or river run-off preclude the proliferation of primary producers. In contrast, the wider continental shelf in the north is under the influence of the nutrient-rich WIBP that supports extensive primary production throughout autumn and winter (Peliz and

Fiúza, 1999; Ribeiro *et al.*, 2005) and provides suitable conditions not only for adult sardine but also for the retention and feeding of sardine larvae (Chícharo *et al.*, 2003; Santos *et al.*, 2004). During winter, a poleward current is recurrently observed on the western coast of the Iberian Peninsula. This current, the Iberian Poleward Current (IPC; Peliz *et al.*, 2005), transports warm oligotrophic water of subtropical origin and typically develops as a tongue of lighter water propagating along the outer continental shelf and slope North of 40°N. It has been reported that the convergent zone created by the IPC plays an important role on shelf retention of biological material (Santos *et al.*, 2004; Ribeiro *et al.*, 2005), and it may even confine the spring bloom to coastal waters (Peliz and Fiúza, 1999; Álvarez-Salgado *et al.*, 2003). The results obtained here suggest that the spring reduction in SPH in the North might have been promoted by the IPC front being located over the shelf and closer to the coast in spring than in autumn, restricting sardine suitable waters close to the coast, as shown by Álvarez-Salgado *et al.*, (2003).

### Acknowledgements

JZ was initially funded by the Portuguese Ministry of Science through a PhD grant and later by the “Programa Nacional de Amostragem Biológica” PNAB-DCR. Echogram scrutiny for sardine echo-identification was performed by Vítor Marques at IPIMAR. We are grateful to “Programa PELAGICOS” funded by the Portuguese Ministry of Science and PNAB-DCR for funding IPIMAR's acoustic surveys, and to all the scientists and technicians who participated in the surveys. The manuscript greatly benefitted from the comments of two anonymous reviewers and from the English revision of Kyle Byers and the editors.

### References

- Álvarez-Salgado, X., Figueiras, F., Perez, F., Groom, S., Nogueira, E., Borges, A., Chou, L., *et al.* 2003. The Portugal coastal counter current off NW Spain: new insights on its biogeochemical variability. *Progress in Oceanography*, 56: 281–321.
- Bakun, A. 1996. *Patterns in the Ocean: Ocean Processes and Marine Population Dynamics*, 1st edn. California Sea Grant College System, La Jolla. 323 pp.
- Barange, M., Coetzee, J., and Twatwa, N. 2005. Strategies of space occupation in anchovy and sardine in the southern Benguela: the role of stock size and intra-specific competition. *ICES Journal of Marine Science*, 62: 645–654.
- Barry, S., and Elith, J. 2006. Error and uncertainty in habitat models. *Journal of Applied Ecology*, 43: 413–423.
- Bernal, M., Stratoudakis, Y., Coombs, S., Angélico, M. M., Lago de Lanzós, A., Porteiro, C., Sagarminaga, Y., *et al.* 2007. Sardine spawning off the European Atlantic coast: characterization of and spatio-temporal variability in spawning habitat. *Progress in Oceanography*, 74: 210–227.
- Bode, A., Álvarez-Ossorio, M., Carrera, P., and Lorenzo, J. 2004. Reconstruction of trophic pathways between plankton and the North Iberian sardine (*Sardina pilchardus*) using stable isotopes. *Scientia Marina*, 68: 165–178.
- Carrera, P., and Porteiro, C. 2003. Stock dynamic of Iberian sardine (*Sardina pilchardus*, W.) and its implication on the fishery off Galicia (NW Spain). *Scientia Marina*, 67: 245–258.
- Chambers, J. M., Cleveland, W. S., Kleiner, B., and Tukey, P. A. 1983. *Graphical Methods for Data Analysis*, 1st edn. Wadsworth Statistics/Probability Series. Wadsworth & Brooks/Cole, Pacific Grove, CA. 336 pp.
- Chícharo, M., Esteves, E., Santos, A., dos Santos, A., Peliz, A., and Ré, P. 2003. Are sardine larvae caught off northern Portugal in

- winter starving? An approach examining nutritional conditions. *Marine Ecology Progress Series*, 257: 303–309.
- Chilès, J.-P., and Delfiner, P. 1999. *Geostatistics—Modelling Spatial Uncertainty*, 1st edn. Wiley Series in Probability and Statistics. John Wiley, New York. 695 pp.
- Coombs, S., Smyth, T., Conway, D., Halliday, N., Bernal, M., Stratoudakis, Y., and Alvarez, P. 2006. Spawning season and temperature relationships for sardine (*Sardina pilchardus*) in the eastern North Atlantic. *Journal of the Marine Biological Association of the UK*, 86: 1245–1252.
- Cury, P., Bakun, A., Crawford, R., Jarre-Teichmann, A., Quiñones, R., Shannon, L., and Verheye, H. 2000. Small pelagics in upwelling systems: patterns of interaction and structural changes in ‘wasp-waist’ ecosystems. *ICES Journal of Marine Science*, 57: 603–618.
- Fawcett, T. 2006. An introduction to ROC analysis. *Pattern Recognition Letters*, 27: 861–874.
- Fiúza, A., Macedo, M., and Guerreiro, M. 1982. Climatological space and time variation of the Portuguese coastal upwelling. *Oceanologia Acta*, 5: 31–40.
- Footo, K., Knudsen, H., Vestnes, G., MacLennan, D., and Simmonds, E. 1987. Calibration of acoustic instruments for fish density estimation: a practical guide. ICES Cooperative Research Report, 144. 57 pp.
- Fréon, P., and Misund, O. 1999. *Dynamics of Pelagic Fish Distribution and Behaviour: Effects on Fisheries and Stock Assessment*, 1st edn. Fishing News Books, Oxford. 348 pp.
- Ganias, K., Somarakis, S., Machias, A., and Theodorou, A. 2003. Evaluation of spawning frequency in a Mediterranean sardine population (*Sardina pilchardus sardina*). *Marine Biology*, 142: 1169–1179.
- Garrido, S., Ben-Hmadou, R., Oliveira, P., Cunha, M., Chícharo, M., and van der Lingen, C. 2008. Spatial and temporal variation in dietary composition and feeding intensity of sardine *Sardina pilchardus* off Portugal and relationships with satellite-derived chlorophyll data. *Marine Ecology Progress Series*, 354: 235–244.
- Garrido, S., Marçalo, A., Zwolinski, J., and van der Lingen, C. 2007. Laboratory investigations on the effect of prey size and concentration on the feeding behaviour of *Sardina pilchardus*. *Marine Ecology Progress Series*, 330: 189–199.
- Giannoulaki, M., Machias, A., Somarakis, S., and Tsimenides, N. 2005. The spatial distribution of anchovy and sardine in the northern Aegean Sea in relation to hydrographic regimes. *Belgian Journal of Zoology*, 135: 151–156.
- Goodman, L. 1990. Acoustic scattering from ocean microstructure. *Journal of Geophysical Research*, 95: 11557–11573.
- Grémillet, D., Lewis, S., Drapeau, L., van Der Lingen, C. D., Hugget, J. A., Coetzee, J. C., Verheye, H. M., *et al.* 2008. Spatial match–mismatch in the Benguela upwelling zone: should we expect chlorophyll and sea-surface temperature to predict marine predator distributions? *Journal of Applied Ecology*, 45: 610–621.
- Guisan, A., and Zimmermann, N. 2000. Predictive habitat distribution models in ecology. *Ecological Modelling*, 135: 147–186.
- Hanley, J., and McNeil, B. 1982. The meaning and use of the area under a receiver operating characteristic (ROC) curve. *Radiology*, 143: 29–36.
- Harrell, F. E., Lee, L. K., and Mark, D. B. 1996. Multivariate prognostic models: issues in developing models, evaluating assumptions and adequacy, and measuring and reducing errors. *Statistics in Medicine*, 15: 361–387.
- Haynes, G., and Nichols, J. 1994. Pilchard (*Sardina pilchardus*, Walbaum) egg distribution in the English Channel from plankton surveys in 1978, 1981, 1988 and 1991. *Journal of Plankton Research*, 16: 771–782.
- ICES. 2006. Report of the Working Group on the assessment of Mackerel, Horse Mackerel, Sardine, and Anchovy. ICES Document CM 2006/ACFM: 36. 601 pp.
- Jenkinson, I. R. 1989. Increases in viscosity may kill fish in some blooms. *In* *Red Tides*, pp. 247–251. Ed. by T. Okaichi, D. M. Anderson, and T. Nemoto. Elsevier, New York.
- Lavery, A., Lawson, G., Benfield, M., and Copley, N. 2007. Determining dominant scatterers of sound in mixed zooplankton populations. *Journal of the Acoustical Society of America*, 122: 3304–3326.
- Lluch-Belda, D., Lluch-Cota, D., Hernández-Vázquez, S., Salinas-Zavala, C., and Schwartzlose, R. 1991. Sardine and anchovy spawning as related to temperature and upwelling in the California Current system. California Cooperative Oceanic Fisheries Investigations Report, 32: 105–111.
- Mackinson, S., Nøttestad, L., Guénette, S., Pitcher, T., Misund, O., and Fernö, A. 1999. Cross-scale observations on distribution and behavioural dynamics of ocean feeding Norwegian spring-spawning herring (*Clupea harengus* L.). *ICES Journal of Marine Science*, 56: 613–626.
- MacLennan, D. N., Fernandes, P. G., and Dalen, J. 2002. A consistent approach to definitions and symbols in fisheries acoustics. *ICES Journal of Marine Science*, 59: 365–369.
- Mair, A. M., Fernandes, P. G., Lebourges-Dhaussy, A., and Brierley, A. S. 2005. An investigation into the zooplankton composition of a prominent 38-kHz scattering layer in the North Sea. *Journal of Plankton Research*, 27: 623–633.
- Mari, X., and Rassoulzadegan, F. 2004. Role of TEP in the microbial food web structure. 1. Grazing behavior of a bacterivorous pelagic ciliate. *Marine Ecology Progress Series*, 279: 13–22.
- McCall, A. 1990. *Dynamic Geography of Marine Fish Populations*, 1st edn. Washington University Press, Seattle. 153 pp.
- McCullagh, P., and Nelder, J. A. 1997. *Generalized Linear Models*, 2nd edn. Chapman and Hall, London. 511 pp.
- Parrish, R., Serra, R., and Grant, W. S. 1989. The monotypic sardines, *Sardina* and *Sardinops*: their taxonomy, distribution, stock structure and zoogeography. *Canadian Journal of Fisheries and Aquatic Sciences*, 43: 2019–2036.
- Passow, U. 2002. Transparent exopolymer particles (TEP) in aquatic environments. *Progress in Oceanography*, 55: 287–333.
- Peliz, A., Dubert, J., Santos, A., Oliveira, P., and Le Cann, B. 2005. Winter upper ocean circulation at western Iberia Basin. Fronts, eddies and poleward flows: an overview. *Deep-Sea Research I*, 52: 621–646.
- Peliz, A., and Fiúza, A., 1999. Temporal and spatial variability of CZCS-derived phytoplankton pigment concentrations off the western Iberian Peninsula. *International Journal of Remote Sensing*, 20: 1363–1403.
- Petitgas, P. 1993. Use of a disjunctive kriging to model areas of high pelagic fish density in acoustic fisheries surveys. *Aquatic Living Resources*, 6: 201–209.
- Petitgas, P., Massé, J., Bourriau, P., Beillois, P., Bergeron, J.-P., Delmas, D., Herbrand, A., *et al.* 2006. Hydro-plankton characteristics and their relationship with sardine and anchovy distributions on the French shelf of the Bay of Biscay. *Scientia Marina*, 70(Suppl. 1): 161–176.
- Planque, B., Bellier, E., and Lazure, P. 2007. Modelling potential spawning habitat of sardine (*Sardina pilchardus*) and anchovy (*Engraulis encrasicolus*) in the Bay of Biscay. *Fisheries Oceanography*, 16: 16–30.
- Queiroga, H., Silva, C., Sorbe, J., and Morgado, F. 2005. Composition and distribution of zooplankton across an upwelling front on the northern Portuguese coast during summer. *Hydrobiologia*, 545: 195–207.
- R Development Core Team, 2005. R: a Language and Environment for Statistical Computing. R Foundation for Statistical Computing, Vienna, Austria. ISBN 3-900051-07-0, <http://www.R-project.org>.
- Relvas, P., Barton, E., Dubert, J., Oliveira, P., Peliz, A., da Silva, J.C.B., and Santos, A. 2007. Physical oceanography of the western Iberia ecosystem: latest views and challenges. *Progress in Oceanography*, 74: 149–173.

- Ribeiro, A., Peliz, A., and Santos, A. 2005. A study of the response of chl-*a* biomass to a winter upwelling event off western Iberia using SeaWiFS and *in situ* data. *Journal of Marine Systems*, 53: 87–107.
- Robinson, C. 2004. Responses of the northern anchovy to the dynamics of the pelagic environment: identification of fish behaviours that may leave the population under risk of overexploitation. *Journal of Fish Biology*, 64: 1072–1087.
- Santos, A. M. P., Peliz, A., Dubert, J., Oliveira, P. B., Angélico, M. M., and Ré, P. 2004. Impact of a winter upwelling event on the distribution and transport of sardine *Sardina pilchardus* eggs and larvae of western Iberia: a retention mechanism. *Continental Shelf Research*, 24: 149–165.
- Silva, A., Skagen, D., Uriarte, A., Massé, J., Santos, M. B., Marques, V., Carrera, P., *et al.* 2009. Geographic variability of sardine dynamics in the Iberian Biscay region. *ICES Journal of Marine Science*, 66: 495–508.
- Somarakis, S., Gantias, K., Siapatis, A., Koutsikopoulos, C., Machias, A., and Papaconstantinou, C. 2006. Spawning habitat and daily egg production of sardine (*Sardina pilchardus*) in the eastern Mediterranean. *Fisheries Oceanography*, 15: 281–292.
- Stanton, T., Chu, D., and Wiebe, P.H. 1996. Acoustic scattering characteristics of several zooplankton groups. *ICES Journal of Marine Science*, 53: 289–295.
- Stratoudakis, Y., Coombs, S., Lago de Lanzós, A., Halliday, N., Costas, G., Caneco, B., Franco, C., *et al.* 2007. Sardine (*Sardina pilchardus*) spawning seasonality in European waters of the northeast Atlantic. *Marine Biology*, 152: 201–212.
- Stratoudakis, Y., and Marçalo, A. 2002. Sardine slipping during purse-seining off northern Portugal. *ICES Journal of Marine Science*, 59: 1256–1262.
- Tameishi, H., Shinomiya, H., Aoki, I., and Sugimoto, T. 1996. Understanding Japanese sardine migrations using acoustic and other aids. *ICES Journal of Marine Science*, 53: 161–171.
- Twatwa, N., van der Lingen, C. D., Drapeau, L., Moloney, C., and Field, J. E. 2005. Characterising and comparing the spawning habitats of anchovy *Engraulis encrasicolus* and sardine *Sardinops sagax* in the southern Benguela upwelling ecosystem. *African Journal of Marine Science*, 27: 487–499.
- Venables, W. N., and Ripley, B. D. 2002. *Modern Applied Statistics with S*, 4th edn. Springer, New York. 462 pp.
- Villa, H., Quintela, J., Coelho, M., Icely, J., and Andrade, J. 1997. Phytoplankton biomass and zooplankton abundance on the south coast of Portugal (Sagres), with special reference to spawning of *Loligo vulgaris*. *Scientia Marina*, 61: 123–129.
- Weill, A., Scalabrin, C., and Diner, N. 1993. MOVIES-B: an acoustic detection description software. Application to shoal species classification. *Aquatic Living Resources*, 6: 169–296.
- Wood, S. 2006. *Generalized Additive Models: an Introduction with R*, 1st edn. Texts in Statistical Sciences. Chapman and Hall/CRC, Boca Raton, FL. 391 pp.
- Wood, S. N., and Augustin, N. H. 2002. GAMs with integrated model selection using penalized regression splines and applications to environmental modelling. *Ecological Modelling*, 157: 157–177.
- Zwolinski, J., Fernandes, P. G., Marques, V., and Stratoudakis, Y. 2009. Estimating fish abundance from acoustic surveys: calculating variance due to acoustic backscatter and length distribution error. *Canadian Journal of Fisheries and Aquatic Sciences*, 66: 2081–2095.
- Zwolinski, J., Mason, E., Oliveira, P., and Stratoudakis, Y. 2006. Fine-scale distribution of sardine (*Sardina pilchardus*) eggs and adults during a spawning event. *Journal of Sea Research*, 56: 294–304.
- Zwolinski, J., Morais, A., Marques, V., Stratoudakis, Y., and Fernandes, P. 2007. Diel variation in the vertical distribution and schooling behaviour of sardine (*Sardina pilchardus*) off Portugal. *ICES Journal of Marine Science*, 64: 963–972.
- Zwolinski, J., Stratoudakis, Y., and Soares, E. 2001. Intra-annual variation in the batch fecundity of sardine off Portugal. *Journal of Fish Biology*, 58: 1633–1645.

doi:10.1093/icesjms/fsq068
